# Supplementary material
Source: publisher figshare collection journal article supplement (https://sage.figshare.com/ndownloader/files/12440633)
Supplement: Supplementary file 1 [file 12440633]

| **Correlation between the clinical/biochemical, oxidative and carbonyl parameters considered in the study** | | | | |  |  |  |  |  |  |  |  |  |  |
| --- | --- | --- | --- | --- | --- | --- | --- | --- | --- | --- | --- | --- | --- | --- |
|  |  |  |  |  |  |  |  |  |  |  |  |  |  |  |
|  | CML | AOPP | PENT | MGO | MDA | HEL | CREA | UREA | TP | GLU | K | P | UP/UC | SBP |
| CML | 1 | - | - | - | - | - | - | - | - | - | - | - | - | - |
| AOPP | +0.559* | 1 | - | - | - | - | - | - | - | - | - | - | - | - |
| PENT | -0.075 | -0.038 | 1 | - | - | - | - | - | - | - | - | - | - | - |
| MGO | +0.019 | -0.100 | -0.227 | 1 | - | - | - | - | - | - | - | - | - | - |
| MDA | +0.355° | +0.751*** | +0.137 | -0.271 | 1 | - | - | - | - | - | - | - | - | - |
| HEL | +0.478* | +0.757*** | +0.167 | -0.274 | +0.904*** | 1 | - | - | - | - | - | - | - | - |
| CREA | +0.493* | +0.559* | -0.089 | -0.190 | +0.473* | +0.504* | 1 | - | - | - | - | - | - | - |
| UREA | +0.464* | +0.618** | +0.152 | -0.421 | +0.721*** | +0.556* | +0.789*** | 1 | - | - | - | - | - | - |
| TP | +0.237 | -0.010 | -0.212 | +0.252 | -0.151 | -0.202 | +0.061 | -0.181 | 1 | - | - | - | - | - |
| GLU | -0.482* | +0.179 | -0.128 | -0.301 | -0.098 | -0.058 | -0.094 | -0.403 | -0.533* | 1 | - | - | - | - |
| K | -0.040 | +0.235 | +0.163 | -0.574* | +0.648** | +0.597** | +0.357 | +0.515* | -0.086 | +0.098 | 1 | - | - | - |
| P | +0.022 | +0.475* | -0.251 | -0.073 | +0.346 | +0.443 | +0.573* | +0.423 | -0-007 | -0.322 | +0.334 | 1 | - | - |
| UP/UC | +0.408 | +0.536* | +0.168 | -0.271 | +0.537* | +0.495 | +0.639** | +0.650** | -0.147 | -0.101 | +0.519* | +0.157 | 1 | - |
| SBP | +0.248 | -0.058 | +0.460* | -0.065 | +0.113 | -0.049 | -0.015 | -0.017 | +0.028 | -0.193 | -0.097 | -0.040 | +0.316 | 1 |
|  | CML | AOPP | PENT | MGO | MDA | HEL | CREA | UREA | TP | GLU | K | P | UP/UC | SBP |
| °P = 0.05; *P < 0.05; **P < 0.01; ***P < 0.001 | | | | | | | | | | | | | | |
|
